# Supplementary material for: Angiotensin II promotes ovarian cancer spheroid formation and metastasis by upregulation of lipid desaturation and suppression of endoplasmic reticulum stress
Source: Springer Nature journal article supplement (doi:10.1186/s13046-019-1127-x), 2019-03-07
Supplement: MOESM1 [file 16532708]

Table 1. The primers sequences used in this study for RT-qPCR

| Gene symbol | Forward primer            | Reverse primer        |
|-------------|---------------------------|-----------------------|
| AGTR1       | CCTCAGATAATGTAAGCTCATCCAC | GCTGCAGAGGAATGTTCTCTT |
| AGTR2       | AGGCACTAAGCAAGCTGATTT     | GCTAGTAGTGGCAAGGGTGG  |
| MAS1        | GACCAATGCCGACTGGTACT      | ACAACACGGGCCTCTATCTG  |
| S14         | GGCAGACCGAGATGAATCCTCA    | CAGGTCCAGGGGTCTTGGTCC |

RT-qPCR: Quantitative reverse transcription PCR

Table 2. The antibodies information and dilution ratio used in this study

| Antibody   | Vendor and catalog number  | Dilution     |
|------------|----------------------------|--------------|
| EGFR       | CST, cat:4267              | 1:1000 WB    |
| p-EGFR     | CST, cat:3777              | 1:1000 WB    |
| MMP2       | CST, cat:40994             | 1:1000 WB    |
| p-AKT      | CST, cat:4060              | 1:1000 WB    |
| p-ERK      | CST, cat:4370              | 1:1000 WB    |
| p-GAB1     | CST, cat:3233              | 1:1000 WB    |
| p-shc      | CST, cat:2434              | 1:1000 WB    |
| SCD1       | CST, cat:2794              | 1:1000 WB    |
| EHHADH     | Santa cruz, cat:sc-393123  | 1:1000 WB    |
| BiP        | CST, cat:3177              | 1:1000 WB    |
| AGTR1      | MyBiosource,cat:MBS244122  | 1:200 IHC,WB |
| SREBP1     | Thermofisher,cat:ma5-11685 | 1:500 WB     |
| CHOP       | CST, cat:5554T             | 1:1000 WB    |
| PERK       | CST,cat:5683               | 1:1000 WB    |
| p-PERK     | CST, cat:3179S             | 1:1000 WB    |
| GAPDH      | CST, cat:5174              | 1:1000 WB    |
| Beta-actin | CST, cat:4970              | 1:1000 WB    |

CST: Cell Signaling Technology

WB: Western blotting

IHC: Immunohistochemistry
